# Supplementary material for: Anti–spike IgG causes severe acute lung injury by skewing macrophage responses during acute SARS-CoV infection
Source: JCI journal article supplement (doi:10.1172/jci.insight.123158), 2019-02-20
Supplement: sd1 [file 1]

You are being redirected.
